# Supplementary material for: Immortal ring-opening polymerization of lactides with super high monomer to catalyst ratios initiated by zirconium and titanium complexes containing multidentate amino-bis(phenolate) ligands
Source: Royal Society of Chemistry journal article supplement (doi:10.1039/c7nj00483d), 2017-01-01
Supplement: c7nj00483d1.pdf [file c7nj00483d1.pdf]

## Supporting Information

### **Immortal Ring-Opening Polymerization of Lactides with Super High Monomer to Catalyst Ratios Initiated by Zirconium and Titanium Complexes Containing Multidentate Amino-bis(phenolate) Ligands**

Baolong Wang, Huanqin Zhao, Liying Wang,\* Junmin Sun, Yongfeng Zhang, Zhenzhu Cao

---

*School of Chemical Engineering, Institute of Coal Conversion and Cyclic Economy, Inner Mongolia  
University of Technology  
49 Aimin Road, Hohhot, 010051, China  
E-mail: wangliying7704@163.com*

**Table S1.** Crystallographic data for complex **2**.

|                                               |                                                                                                 |
|-----------------------------------------------|-------------------------------------------------------------------------------------------------|
| Empirical formula                             | C <sub>74</sub> H <sub>116</sub> N <sub>4</sub> O <sub>6</sub> Zr·C <sub>7</sub> H <sub>8</sub> |
| Formula weight                                | 1341.07                                                                                         |
| Temperature/K                                 | 282(2) K                                                                                        |
| Crystal system                                | triclinic                                                                                       |
| Space group                                   | P-1                                                                                             |
| a/Å                                           | 11.8670(6)                                                                                      |
| b/Å                                           | 16.2871(9)                                                                                      |
| c/Å                                           | 24.4789(14)                                                                                     |
| α/°                                           | 105.498(2)                                                                                      |
| β/°                                           | 90.376(2)                                                                                       |
| γ/°                                           | 102.180(2)                                                                                      |
| Volume/Å <sup>3</sup>                         | 4446.6(4)                                                                                       |
| Z                                             | 2                                                                                               |
| ρ <sub>calc</sub> /mg/mm <sup>3</sup>         | 1.002                                                                                           |
| m/mm <sup>-1</sup>                            | 0.169                                                                                           |
| F(000)                                        | 1452                                                                                            |
| Crystal size/mm <sup>3</sup>                  | 0.2 × 0.1 × 0.1                                                                                 |
| Theta Min-Max [Deg]                           | 2.8 to 25.0°                                                                                    |
| Index ranges                                  | -14 ≤ h ≤ 14, -19 ≤ k ≤ 19, -29 ≤ l ≤ 29                                                        |
| Radiation/ Å                                  | MoKa /0.71073                                                                                   |
| Tot., Uniq. Data, R(int)                      | 15681, 15681, 0.043                                                                             |
| Observed data [I > 2.0 sigma(I)]              | 13671                                                                                           |
| Nref, Npar                                    | 15681, 848                                                                                      |
| R, wR2, S                                     | 0.0495, 0.1426, 1.00                                                                            |
| Max. and Av. Shift/Error                      | 0.00, 0.00                                                                                      |
| Min. and Max. Resd. Dens. [e/Å <sup>3</sup> ] | -0.43, 0.81                                                                                     |

**Table S2.** Selected bond lengths (Å) and angles (°) for complex **2**.

---

|             |            |           |             |
|-------------|------------|-----------|-------------|
| Zr1-N1      | 2.401(2)   | Zr1-O2    | 2.01175(17) |
| Zr1-N2      | 2.418(2)   | Zr1-O3    | 2.0135(16)  |
| Zr1-O1      | 2.0231(17) | Zr1-O4    | 2.0118(16)  |
| <br>        |            |           |             |
| Zr1-N1- C15 | 106.97(14) | N1-Zr1-N2 | 175.31(7)   |
| Zr1-N1-C16  | 109.75(14) | O1-Zr1-N1 | 78.16(7)    |
| Zr1-N1-C31  | 109.81(14) | O1-Zr1-N2 | 98.10(7)    |
| Zr1-N2-C34  | 105.84(13) | O2-Zr1-N1 | 80.72(7)    |
| Zr1-N2-C49  | 107.71(14) | O2-Zr1-N2 | 103.13(7)   |
| Zr1-N2-C64  | 113.13(14) | O1-Zr1-O2 | 158.72(7)   |
| Zr1-O1- C1  | 143.44(15) | O3-Zr1-N1 | 98.47(7)    |
| Zr1-O2-C18  | 140.52(15) | O3-Zr1-N2 | 78.98(7)    |
| Zr1-O3-C40  | 142.88(15) | O1-Zr1-O3 | 95.55(7)    |
| Zr1-O4- C55 | 143.08(15) | O2-Zr1-O3 | 90.06(7)    |
| Zr1-O1-C1   | 143.44(15) | O4-Zr1-N1 | 102.42(7)   |
| Zr1-O2-C18  | 140.52(15) | O4-Zr1-N2 | 80.33(7)    |
| <br>        |            |           |             |
|             |            | O1-Zr1-O4 | 90.84(7)    |
|             |            | O2-Zr1-O4 | 91.17(7)    |
|             |            | O3-Zr1-O4 | 159.00(7)   |

---

**Table S3.** Crystallographic data for complex **3**.

|                                               |                                                                                 |
|-----------------------------------------------|---------------------------------------------------------------------------------|
| Empirical formula                             | C <sub>74</sub> H <sub>122</sub> N <sub>4</sub> O <sub>10</sub> Ti <sub>2</sub> |
| Formula weight                                | 1323.50                                                                         |
| Temperature/K                                 | 173(2) K                                                                        |
| Crystal system                                | triclinic                                                                       |
| Space group                                   | P-1                                                                             |
| a/Å                                           | 13.4552(12)                                                                     |
| b/Å                                           | 13.5618(12)                                                                     |
| c/Å                                           | 25.287(2)                                                                       |
| α/°                                           | 96.117(3)                                                                       |
| β/°                                           | 103.136(3)                                                                      |
| γ/°                                           | 91.355(3)                                                                       |
| Volume/Å <sup>3</sup>                         | 4462.5(7)                                                                       |
| Z                                             | 2                                                                               |
| ρ <sub>calc</sub> /mg/mm <sup>3</sup>         | 0.985                                                                           |
| m/mm <sup>-1</sup>                            | 0.226                                                                           |
| F(000)                                        | 1436                                                                            |
| Crystal size/mm <sup>3</sup>                  | 0.2 × 0.2 × 0.1                                                                 |
| Θ range for data collection                   | 2.81 to 23.23°                                                                  |
| Index ranges                                  | -14 ≤ h ≤ 14, -14 ≤ k ≤ 15, -28 ≤ l ≤ 27                                        |
| Radiation/Å                                   | MoKa / 0.71073                                                                  |
| Tot., Uniq. Data, R(int)                      | 12688, 12688, 0.086                                                             |
| Observed data [I > 2.0 sigma(I)]              | 9810                                                                            |
| Nref, Npar                                    | 12688, 830                                                                      |
| R, wR2, S                                     | 0.0588, 0.1580, 1.02                                                            |
| Max. and Av. Shift/Error                      | 0.00, 0.00                                                                      |
| Min. and Max. Resd. Dens. [e/Å <sup>3</sup> ] | -0.40, 0.49                                                                     |

**Table S4.** Selected bond lengths (Å) and angles (°) for complex **3**.

---

|             |            |            |            |
|-------------|------------|------------|------------|
| Ti1-N1      | 2.398(2)   | Ti1-O3     | 1.917(2)   |
| Ti1-O1      | 2.395(2)   | Ti1-O4     | 1.907(2)   |
| Ti1-O2      | 1.773(2)   | Ti1-O10    | 1.788(2)   |
| Ti2-N4      | 2.414(3)   | Ti2-O8     | 1.774(2)   |
| Ti2-O6      | 1.905(2)   | Ti2-O9     | 1.800(2)   |
| Ti2-O7      | 1.911(2)   | Ti2-O5     | 2.366(2)   |
| <br>        |            |            |            |
| Ti1-O1-C55  | 118.9(2)   | O1-Ti1-O2  | 174.25(9)  |
| Ti1-O1-C56  | 121.29(17) | O1-Ti1-O3  | 81.74(8)   |
| Ti1-O2-C4   | 165.0(2)   | O1-Ti1-O4  | 81.60(8)   |
| Ti1-O3-C7   | 132.65(18) | O1-Ti1-O10 | 82.55(10)  |
| Ti1-O4-C12  | 141.58(18) | O1-Ti1-N1  | 81.35(8)   |
| Ti1-O10-C1  | 158.2(3)   | O2-Ti1-O3  | 97.47(10)  |
| Ti1-N1-C9   | 110.02(16) | O2-Ti1-O4  | 97.55(10)  |
| Ti1-N1-C10  | 110.25(16) | O2-Ti1-O10 | 103.21(11) |
| Ti1-N1-C22  | 108.99(17) | O2-Ti1-N1  | 92.90(9)   |
| Ti2-O6-C27  | 138.02(19) | O3-Ti1-O4  | 157.27(9)  |
| Ti2-O7-C41  | 140.2(2)   | O3-Ti1-O10 | 96.59(10)  |
| Ti2-O8-C58  | 168.8(2)   | O3-Ti1-N1  | 82.18(8)   |
| Ti2-O9-C61' | 148.4(5)   | O4-Ti1-O10 | 96.46(10)  |
| Ti2-N4-C38  | 110.29(16) | O4-Ti1-N1  | 80.12(9)   |
| Ti2-N4-C39  | 109.60(17) | O10-Ti1-N1 | 163.86(10) |
| Ti2-N4-C51  | 107.91(16) | O6-Ti2-O7  | 157.34(10) |
| <br>        |            |            |            |
|             |            | O6-Ti2-O8  | 97.57(11)  |
|             |            | O6-Ti2-O9  | 97.46(10)  |
|             |            | O6-Ti2-N4  | 80.95(9)   |
|             |            | O7-Ti2-O8  | 95.97(10)  |
|             |            | O7-Ti2-O9  | 97.28(10)  |
|             |            | O7-Ti2-N4  | 80.10(9)   |
|             |            | O8-Ti2-O9  | 102.39(11) |
|             |            | O8-Ti2-N4  | 93.77(9)   |
|             |            | O9-Ti2-N4  | 163.83(10) |

---

**Table S5.** Ring-Opening polymerization of lactide initiated by complexes **1-4**.

| Run | Cat.                  | Monomer | T/°C | [LA] <sub>0</sub> /[Cat] <sub>0</sub> /[BnOH] <sub>0</sub> | t/(h) | Conv. <sup>a</sup> (%) | <i>M</i> <sub>n,calcd</sub> (10 <sup>4</sup> ) <sup>b</sup> | (10 <sup>4</sup> ) <i>M</i> <sub>n</sub> <sup>c</sup> | PDI <sup>c</sup> | TOF <sup>d</sup> | <i>P</i> <sub>r</sub> <sup>e</sup> |
|-----|-----------------------|---------|------|------------------------------------------------------------|-------|------------------------|-------------------------------------------------------------|-------------------------------------------------------|------------------|------------------|------------------------------------|
| 1.  | <b>1</b>              | L-LA    | 140  | 800/1/0                                                    | 1     | 45                     | 2.60                                                        | 0.74                                                  | 1.13             | 360              | -                                  |
| 2.  | <b>1</b>              | L-LA    | 140  | 800/1/0                                                    | 2     | 68                     | 3.92                                                        | 0.86                                                  | 1.15             | 272              | -                                  |
| 3.  | <b>1</b>              | L-LA    | 140  | 800/1/0                                                    | 3     | 83                     | 4.79                                                        | 0.92                                                  | 1.24             | 221              | -                                  |
| 4.  | <b>1</b>              | L-LA    | 140  | 1200/1/0                                                   | 2.5   | 56                     | 4.85                                                        | 1.86                                                  | 1.24             | 269              | -                                  |
| 5.  | <b>1</b>              | L-LA    | 140  | 1200/1/0                                                   | 3.5   | 71                     | 6.14                                                        | 2.52                                                  | 1.24             | 243              | -                                  |
| 6.  | <b>1</b>              | L-LA    | 140  | 1200/1/0                                                   | 4.5   | 76                     | 6.57                                                        | 2.97                                                  | 1.27             | 203              | -                                  |
| 7.  | <b>1</b>              | L-LA    | 140  | 1200/1/0                                                   | 5.5   | 80                     | 6.92                                                        | 3.11                                                  | 1.19             | 175              | -                                  |
| 8.  | <b>1</b>              | L-LA    | 140  | 1600/1/0                                                   | 4     | 49                     | 5.65                                                        | 1.25                                                  | 1.15             | 196              | -                                  |
| 9.  | <b>1</b>              | L-LA    | 140  | 1600/1/0                                                   | 6     | 70                     | 8.07                                                        | 1.43                                                  | 1.11             | 187              | -                                  |
| 10. | <b>1</b>              | L-LA    | 140  | 1600/1/0                                                   | 7     | 77                     | 8.88                                                        | 2.17                                                  | 1.15             | 176              | -                                  |
| 11. | <b>1</b>              | rac-LA  | 160  | 150 000/1/0                                                | 70    | 56                     | 605.35                                                      | 5.61                                                  | 1.24             | 1200             | 0.51                               |
| 12. | <b>1</b> <sup>f</sup> | rac-LA  | 160  | 1000/1/0                                                   | 41    | 90                     | 6.49                                                        | 3.43                                                  | 1.26             | 22               | 0.59                               |
| 13. | <b>2</b>              | rac-LA  | 140  | 1200/1/0                                                   | 5     | 72                     | 6.23                                                        | 3.02                                                  | 1.29             | 173              | 0.62                               |
| 14. | <b>2</b>              | rac-LA  | 160  | 200 000/1/0                                                | 46    | 57                     | 817.62                                                      | 2.86                                                  | 1.28             | 2478             | 0.60                               |
| 15. | <b>2</b>              | rac-LA  | 160  | 150 000/1/10                                               | 11    | 48                     | 103.77                                                      | 4.05                                                  | 1.58             | 6574             | 0.64                               |
| 16. | <b>2</b>              | rac-LA  | 160  | 200 000/1/10                                               | 11    | 34                     | 98.00                                                       | 1.04                                                  | 1.27             | 6121             | 0.61                               |
| 17. | <b>2</b>              | rac-LA  | 160  | 200 000/1/100                                              | 46    | 52                     | 14.99                                                       | 1.05                                                  | 1.36             | 2247             | 0.61                               |
| 18. | <b>2</b>              | rac-LA  | 160  | 154 900/1/0                                                | 20    | 48                     | 535.82                                                      | 2.76                                                  | 1.48             | 3718             | 0.67                               |
| 19. | <b>2</b>              | rac-LA  | 160  | 15 500/1/0                                                 | 11.5  | 63                     | 70.37                                                       | 2.44                                                  | 1.45             | 849              | 0.65                               |
| 20. | <b>2</b>              | rac-LA  | 160  | 31 000/1/0                                                 | 11.5  | 57                     | 127.34                                                      | 2.66                                                  | 1.48             | 1537             | 0.71                               |
| 21. | <b>2</b>              | rac-LA  | 160  | 46 500/1/0                                                 | 10.5  | 55                     | 184.31                                                      | 2.69                                                  | 1.43             | 2436             | 0.66                               |
| 22. | <b>2</b>              | rac-LA  | 160  | 77 400/1/0                                                 | 10.5  | 53                     | 295.63                                                      | 2.86                                                  | 1.46             | 3907             | 0.67                               |
| 23. | <b>2</b>              | L-LA    | 160  | 46 500/1/0                                                 | 26    | 74                     | 247.98                                                      | 1.03                                                  | 1.36             | 1323             | -                                  |
| 24. | <b>2</b>              | L-LA    | 160  | 77 400/1/0                                                 | 31    | 63                     | 351.41                                                      | 0.99                                                  | 1.33             | 1573             | -                                  |
| 25. | <b>2</b>              | L-LA    | 160  | 154 900/1/0                                                | 31    | 65                     | 725.59                                                      | 1.02                                                  | 1.27             | 3248             | -                                  |
| 26. | <b>3</b>              | L-LA    | 140  | 500/1/0                                                    | 4     | 43                     | 1.55                                                        | 0.62                                                  | 1.20             | 54               | -                                  |
| 27. | <b>3</b>              | L-LA    | 140  | 500/1/0                                                    | 6     | 57                     | 2.07                                                        | 0.87                                                  | 1.31             | 48               | -                                  |
| 28. | <b>3</b>              | L-LA    | 140  | 1000/1/0                                                   | 35    | 90                     | 6.49                                                        | 1.82                                                  | 1.29             | 26               | -                                  |
| 29. | <b>4</b>              | L-LA    | 140  | 500/1/0                                                    | 6.5   | 67                     | 2.42                                                        | 1.31                                                  | 1.46             | 52               | -                                  |
| 30. | <b>4</b>              | L-LA    | 140  | 500/1/0                                                    | 7.5   | 71                     | 2.57                                                        | 1.37                                                  | 1.28             | 47               | -                                  |

<sup>a</sup> Determined by <sup>1</sup>H NMR spectroscopy. <sup>b</sup>  $M_{n,calcd} = 1/2 \times ([LA]_0/[Cat]_0) \times 144.13 \times \text{Conv.}\% \text{ g mol}^{-1}$ ; with the presence of BnOH,  $M_{n,calcd} = ([LA]_0/[Cat]_0/[BnOH]_0) \times 144.13 \times \text{Conv.}\% \text{ g mol}^{-1}$ . <sup>c</sup> Determined by GPC analysis with polystyrene standards in THF with the correction factor of x 0.58. <sup>d</sup> TOFs were calculated as (mol of LA consumed)/(mol of catalyst × time of polymerization) h<sup>-1</sup>. <sup>e</sup> *P*<sub>r</sub> is the probability of a racemic linkage between two repetitive units calculated from homonuclear decoupled <sup>1</sup>H NMR spectrum. <sup>f</sup> Under air environment.

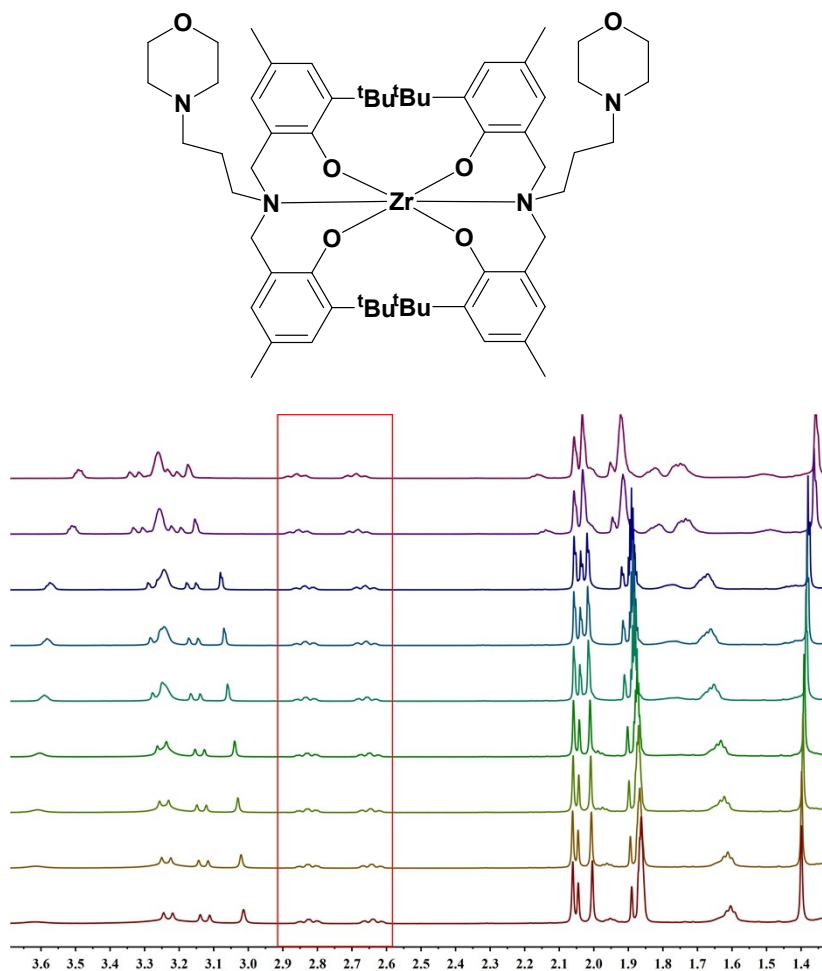

Figure S1 Variable-Temperature <sup>1</sup>H NMR spectra (500 MHz) of complex 1.

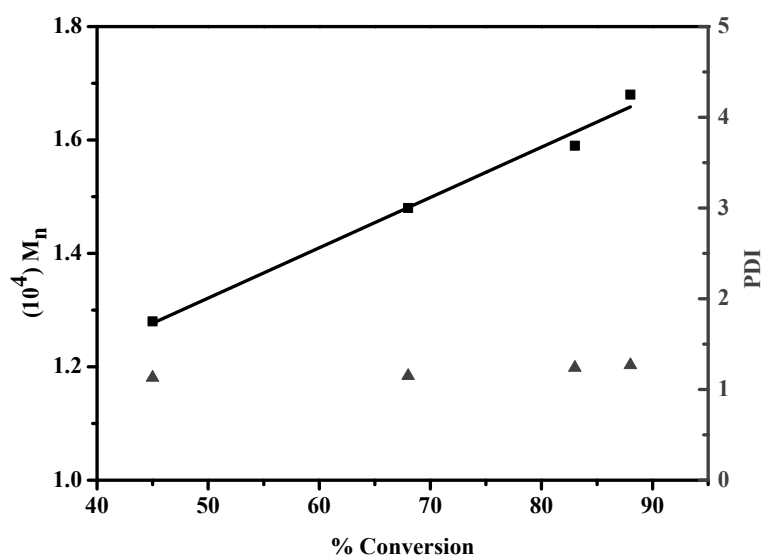

Figure S2 M<sub>n</sub> and PDI versus conversion plots for ROP of L-lactide initiated by complex 1. (Condition: [LA]<sub>0</sub>/[1]<sub>0</sub> = 800/1, R<sup>2</sup> = 0.9708; in the melt, at 140 °C.)

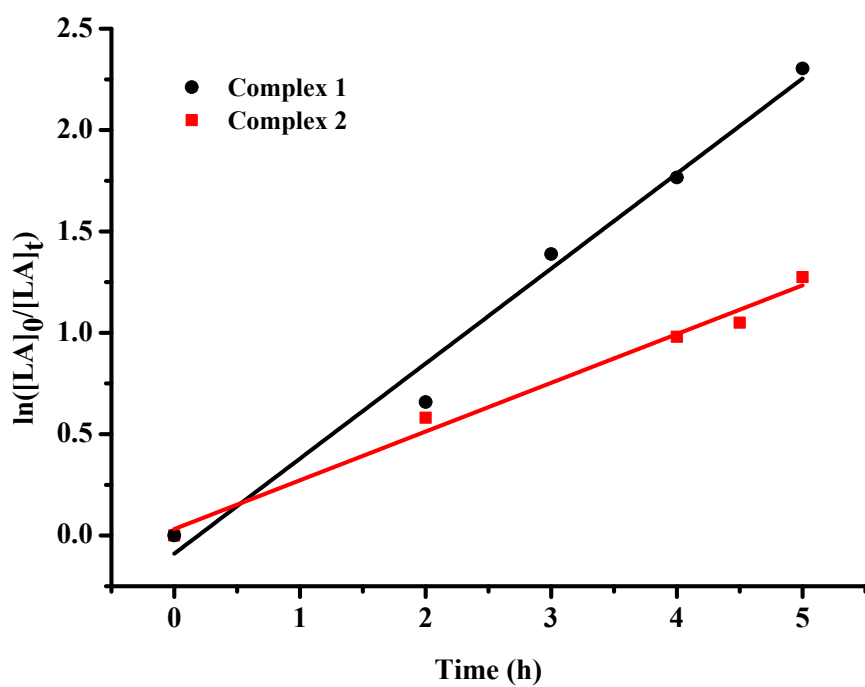

**Figure S3** Plots of  $\ln([LA]_0/[LA]_t)$  for ROP of *rac*-lactide versus time initiated by complexes **1** and **2**. (Conditions:  $[LA]_0/[1]_0 = 1200/1$ , in the melt, at 140 °C,  $y = 0.4688x - 0.0894$ ,  $R^2 = 0.9791$ ;  $[LA]_0/[2]_0 = 1200/1$ , in the melt, at 140 °C,  $y = 0.2406x + 0.0321$ ,  $R^2 = 0.9846$ ).

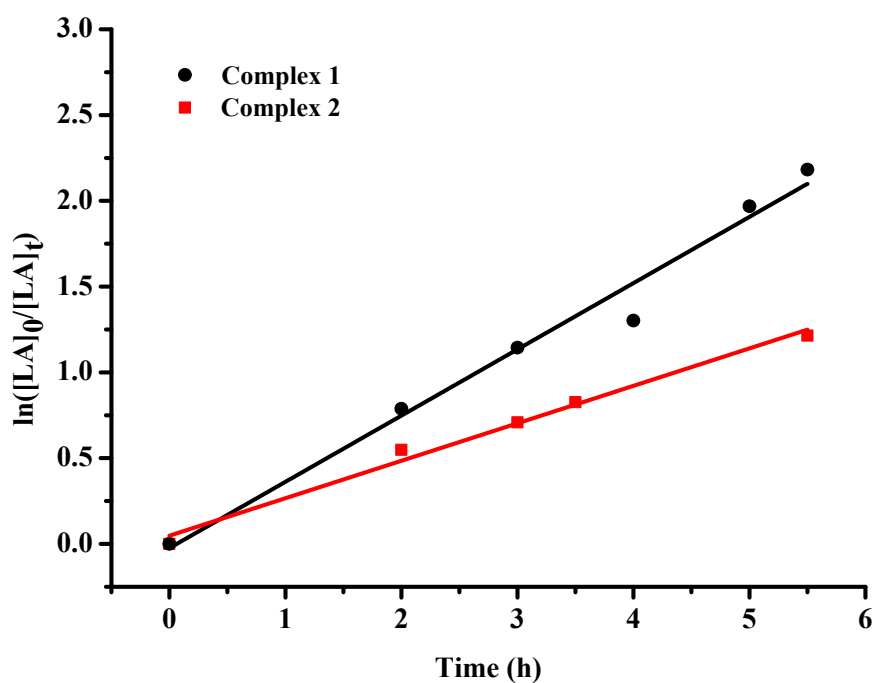

**Figure S4** Plots of  $\ln([LA]_0/[LA]_t)$  for ROP of *L*-lactide versus time initiated by complexes **1** and **2**. (Conditions:  $[LA]_0/[1]_0 = 1000/1$ , in the melt, at 160 °C,  $y = 0.3861x - 0.0241$ ,  $R^2 = 0.9761$ ;  $[LA]_0/[2]_0 = 1000/1$ , in the melt, at 160 °C,  $y = 0.2184x + 0.0481$ ,  $R^2 = 0.9867$ ).



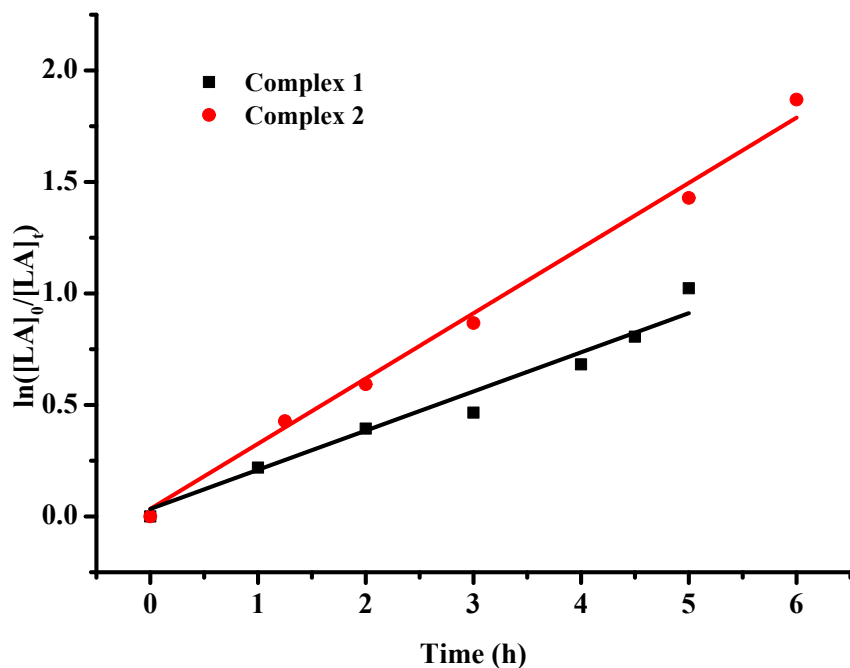

**Figure S5** Plots of  $\ln([LA]_0/[LA]_t)$  for ROP of *rac*-lactide versus time initiated by complexes **1** and **2**. (Conditions:  $[LA]_0/[1]_0 = 1000/1$ , in the melt, at 160 °C,  $y = 0.1851x - 0.0031$ ,  $R^2 = 0.9927$ ;  $[LA]_0/[2]_0 = 1000/1$ , in the melt, at 160 °C,  $y = 0.2993x + 0.0039$ ,  $R^2 = 0.9622$ ).

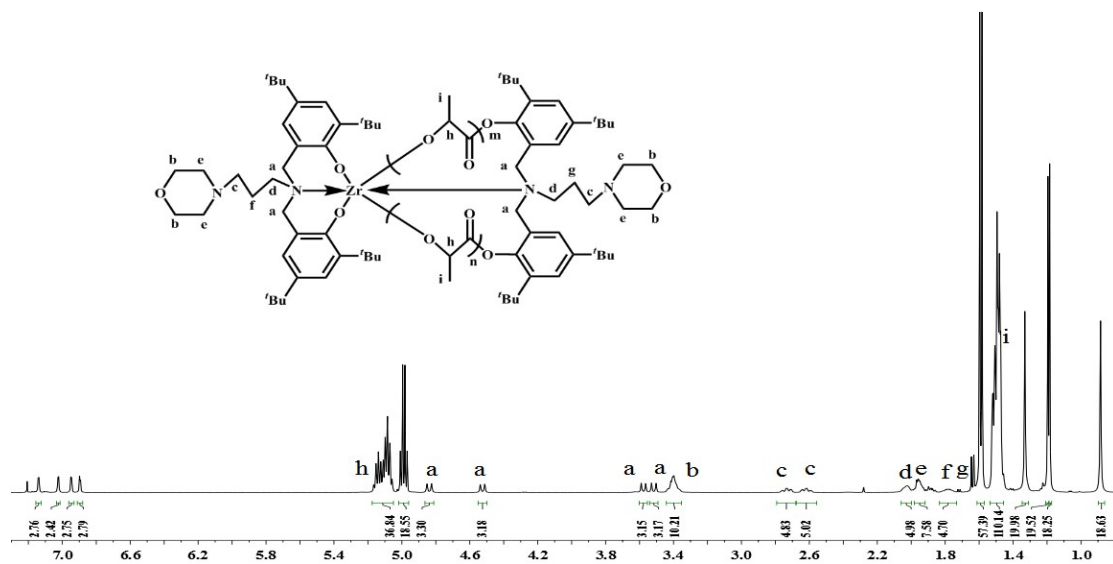

**Figure S6**  $^1\text{H}$  NMR spectra (500 MHz,  $\text{CDCl}_3$ ) of the reaction of complex **2** with *rac*-lactide in the melt state. Conditions:  $[LA]_0 : [2]_0 = 20 : 1$ , 160 °C.

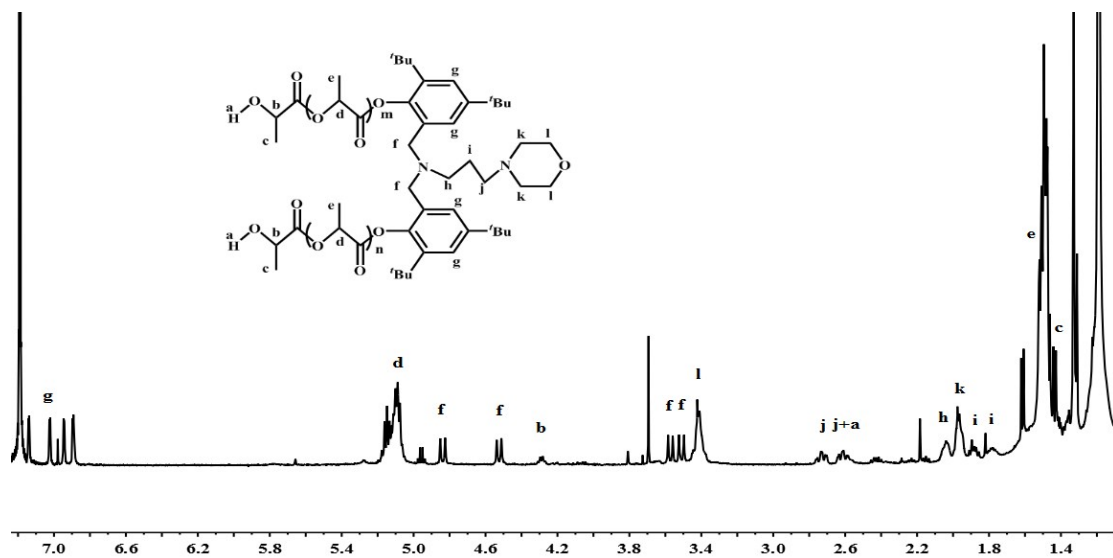

**Figure S7**  $^1\text{H}$  NMR spectra of oligomeric PLA obtained by complex **2** (500 MHz,  $\text{CDCl}_3$ ). Conditions:  $[\text{LA}]_0 : [\mathbf{2}]_0 = 50 : 1$ ,  $160^\circ\text{C}$ .

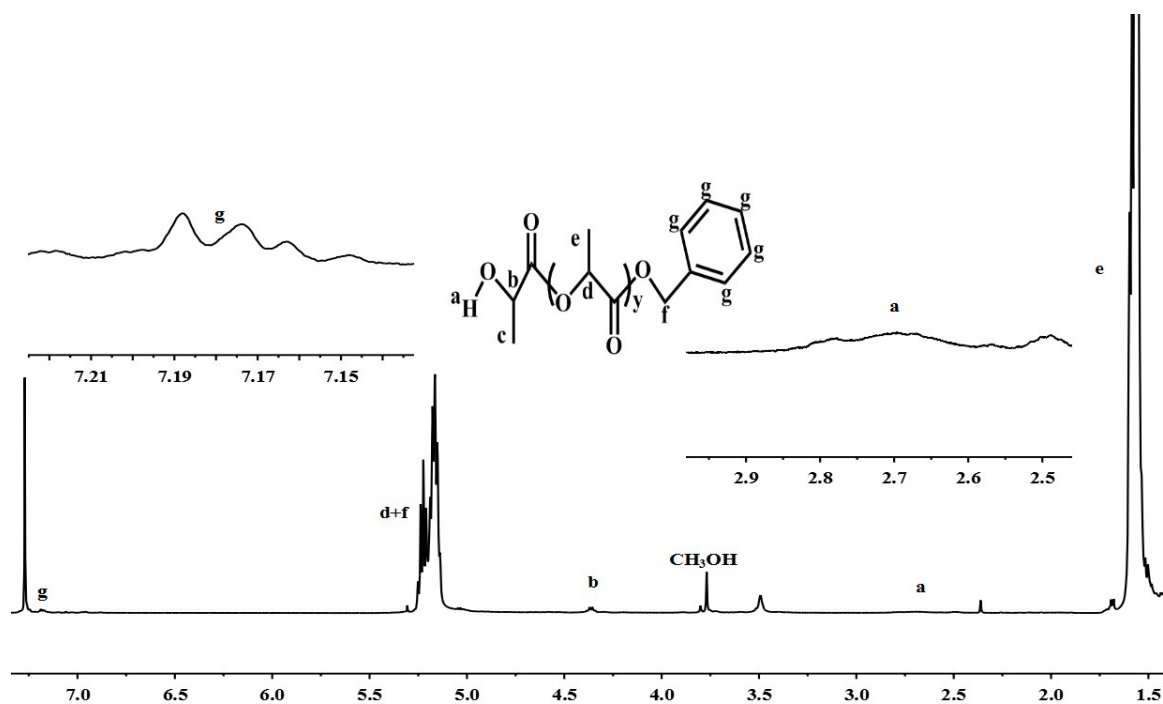

**Figure S8**  $^1\text{H}$  NMR spectra of oligomeric PLA obtained by complex **2** (500 MHz,  $\text{CDCl}_3$ ). Conditions:  $[\text{LA}]_0 : [\mathbf{2}]_0 : [\text{BnOH}]_0 = 50 : 1 : 1$ ,  $160^\circ\text{C}$ .

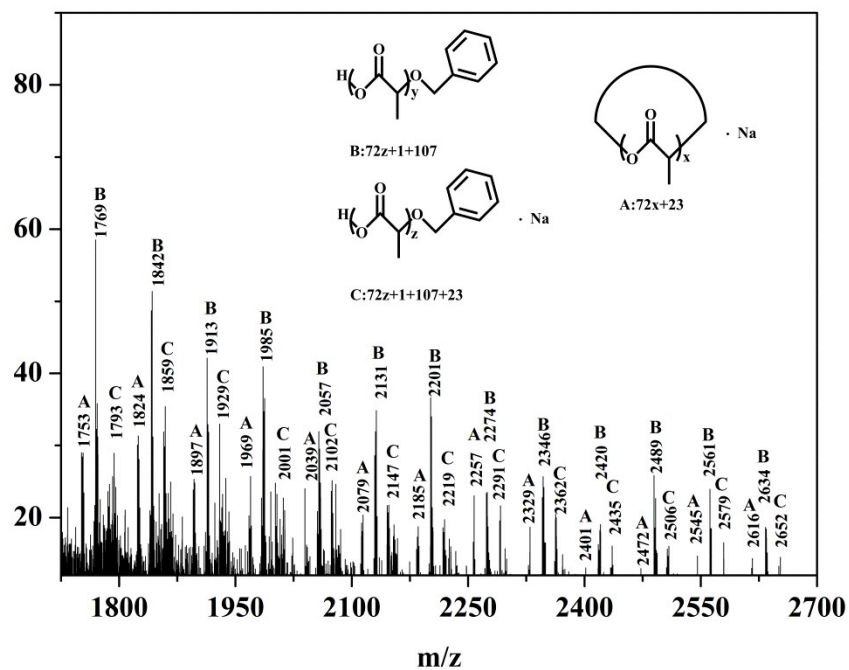

**Figure S9** MALDI-TOF mass spectrum of the polymerization of *rac*-lactide initiated by complex 2. Conditions:  $[LA]_0 : [2]_0 : [BnOH]_0 = 1000 : 1 : 10$ , at 160 °C.

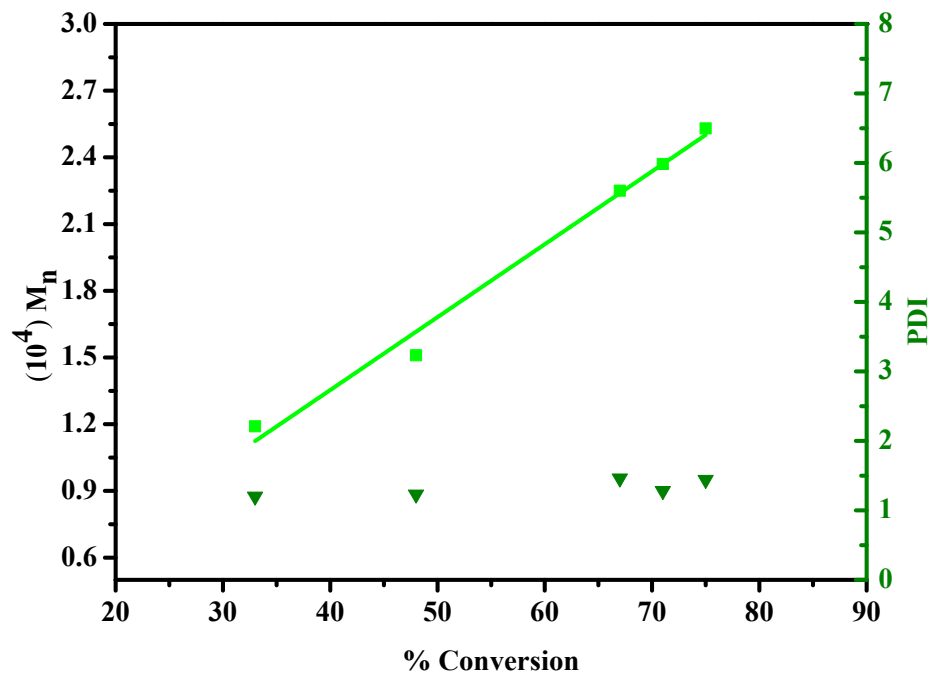

**Figure S10**  $M_n$  and PDI versus conversion plots for ROP of *L*-lactide initiated by complex 4. (Condition:  $[LA]_0/[4]_0 = 500/1$ , at 140 °C, in the melt,  $R^2 = 0.9840$ )

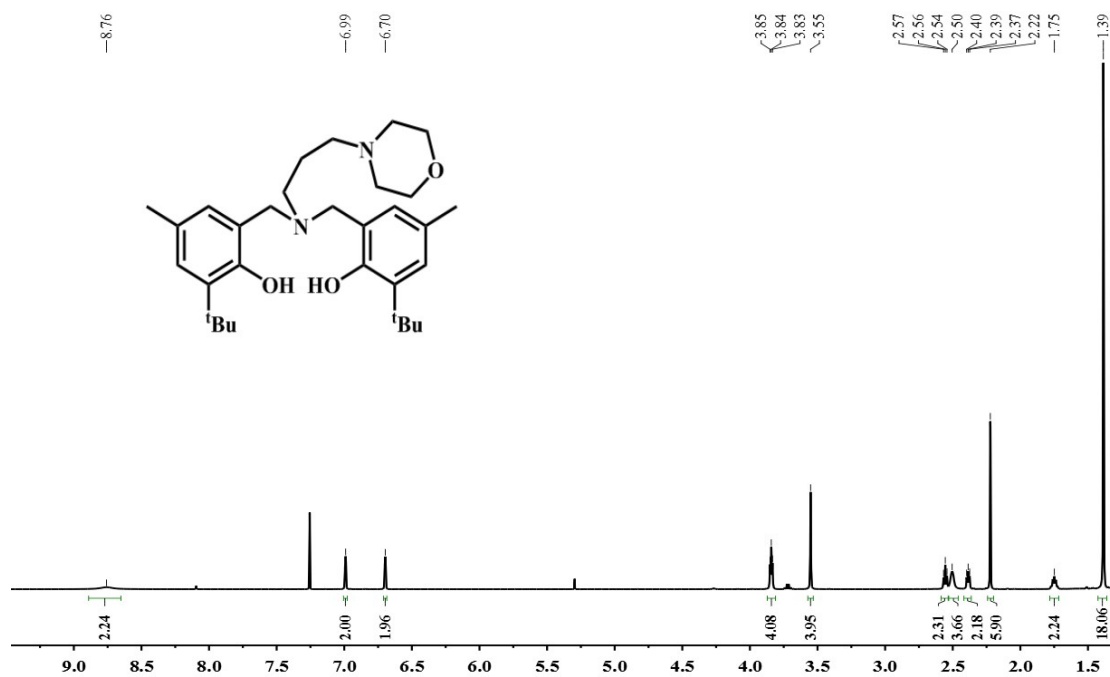

Figure S11 The <sup>1</sup>H NMR spectrum of ligand L<sup>1</sup>H (CDCl<sub>3</sub>, 500MHz).

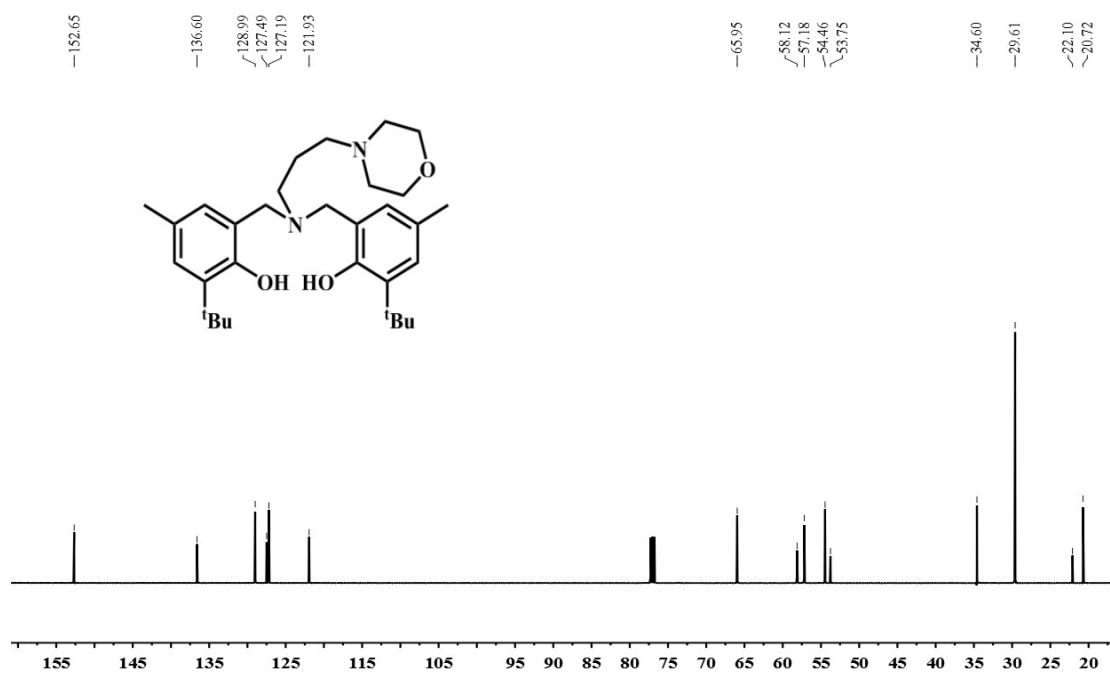

Figure S12 The <sup>13</sup>C NMR spectrum of ligand L<sup>1</sup>H (CDCl<sub>3</sub>, 125MHz).

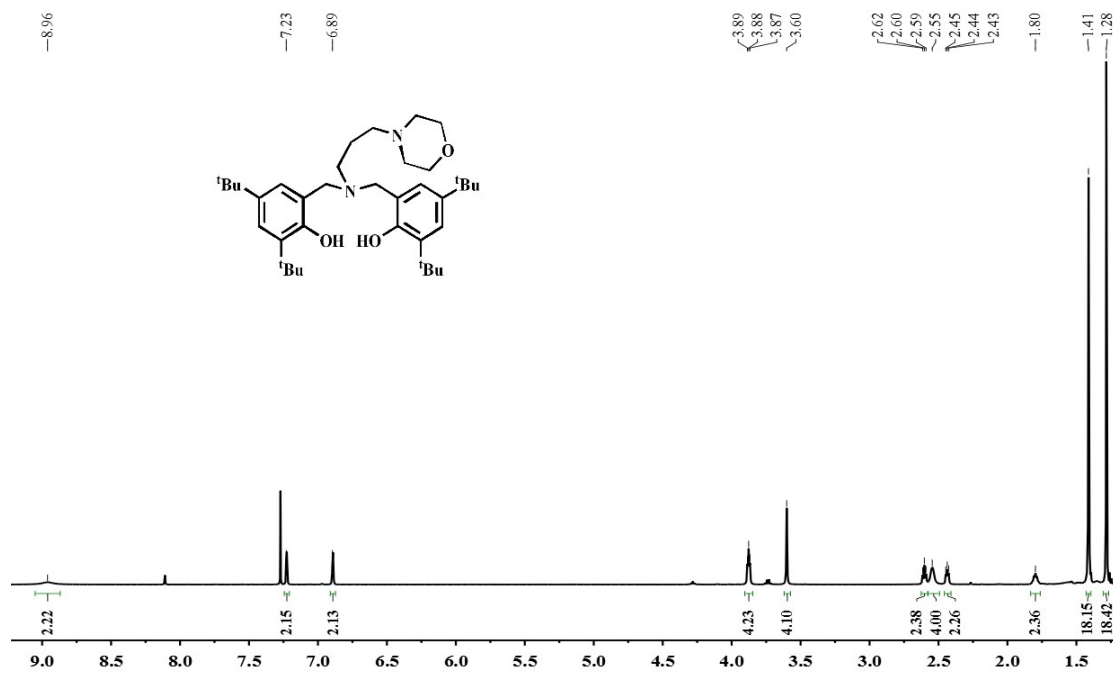

Figure S13 The <sup>1</sup>H NMR spectrum of ligand L<sup>2</sup>H (CDCl<sub>3</sub>, 500MHz).

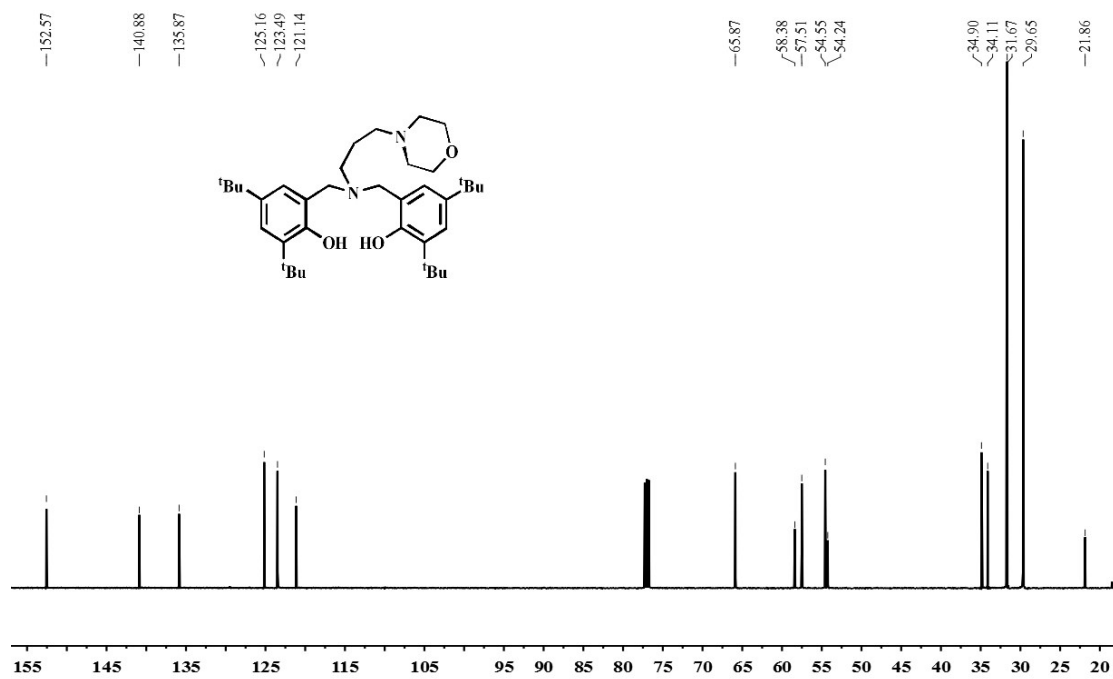

Figure S14 The <sup>13</sup>C NMR spectrum of ligand L<sup>2</sup>H (CDCl<sub>3</sub>, 125MHz).

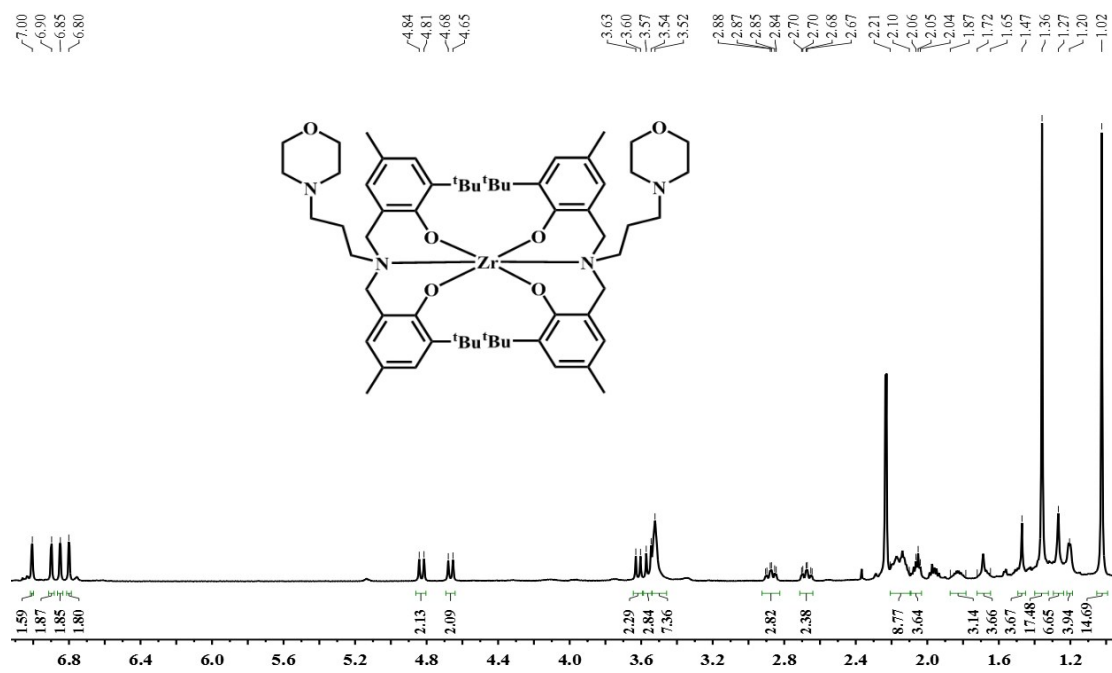

**Figure S15** The <sup>1</sup>H NMR spectrum of complex **1** (CDCl<sub>3</sub>, 500MHz).

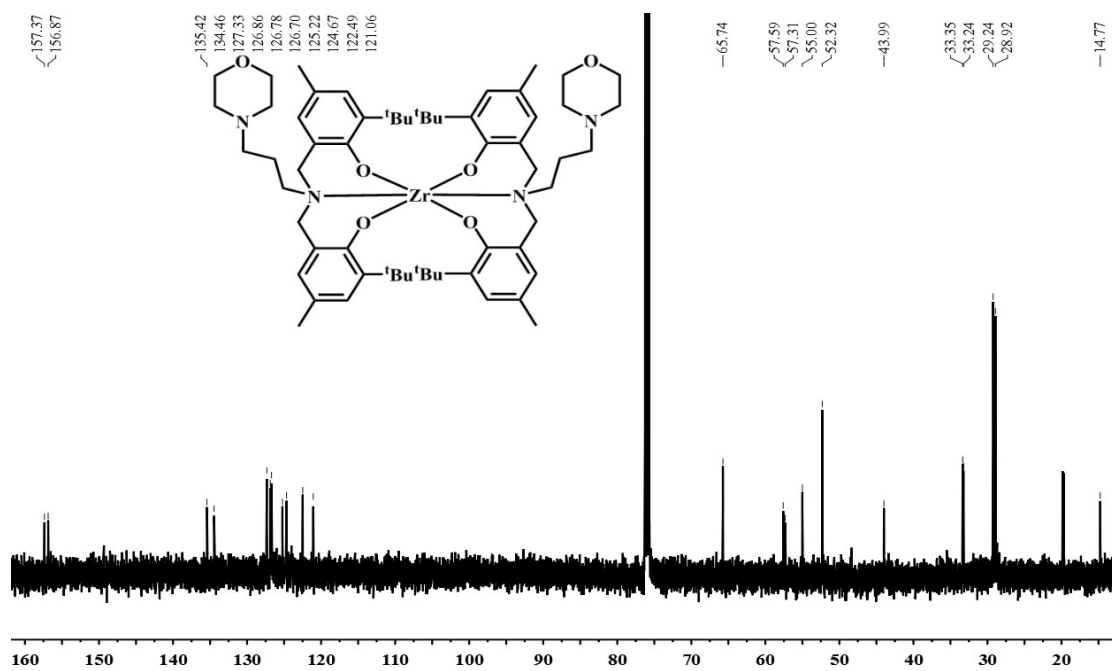

**Figure S16** The <sup>13</sup>C NMR spectrum of complex **1** (CDCl<sub>3</sub>, 125MHz).

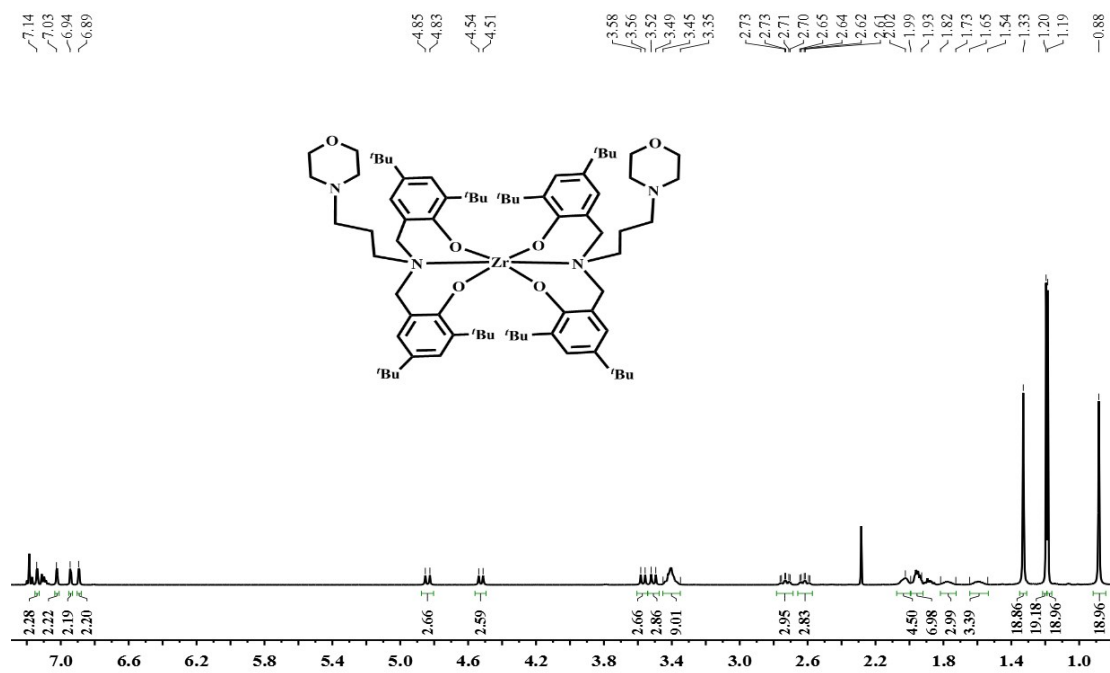

Figure S17 The  $^1\text{H}$  NMR spectrum of complex **2** ( $\text{CDCl}_3$ , 500MHz).

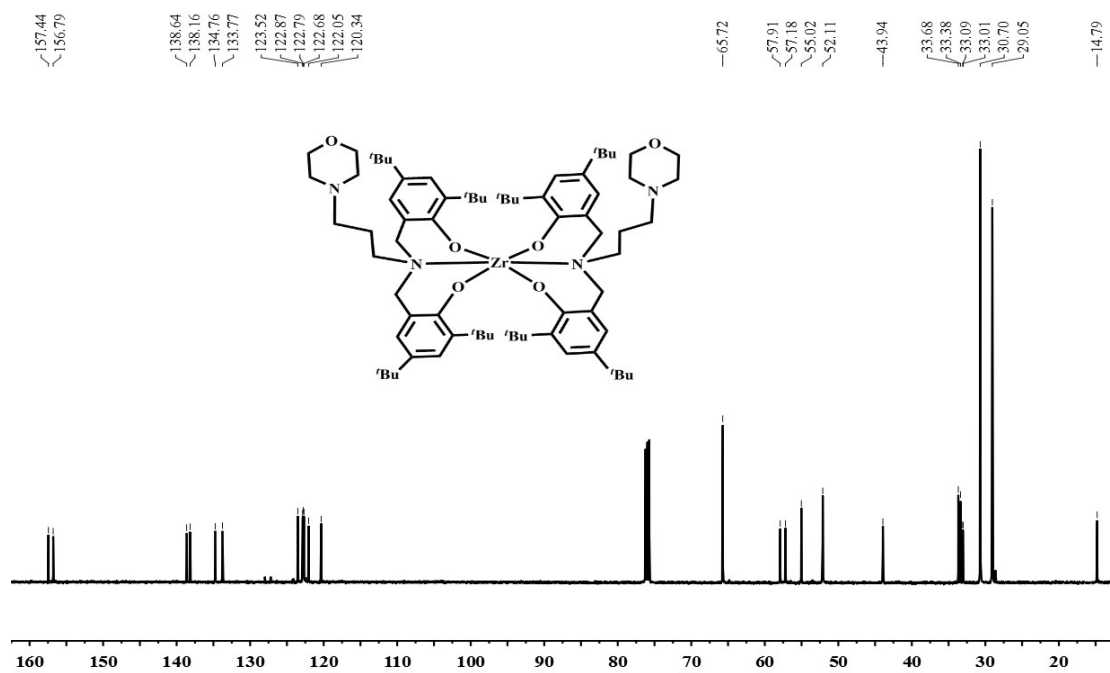

Figure S18 The  $^{13}\text{C}$  NMR spectrum of complex **2** ( $\text{CDCl}_3$ , 125MHz).

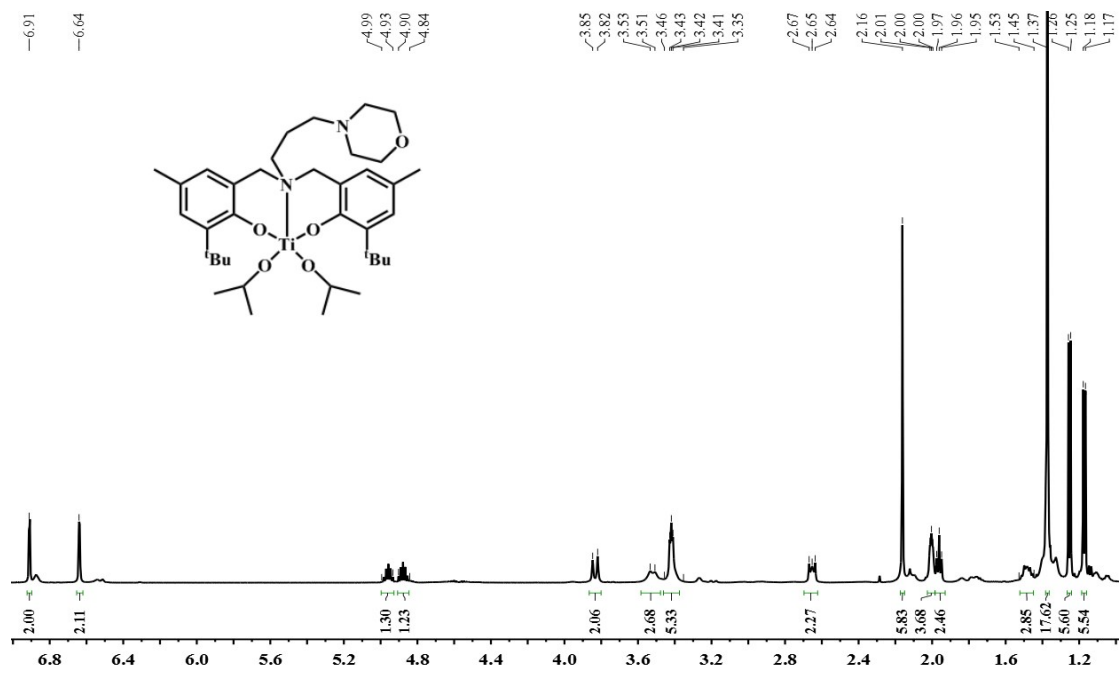

Figure S19 The  $^1\text{H}$  NMR spectrum of complex **3** ( $\text{CDCl}_3$ , 500MHz).

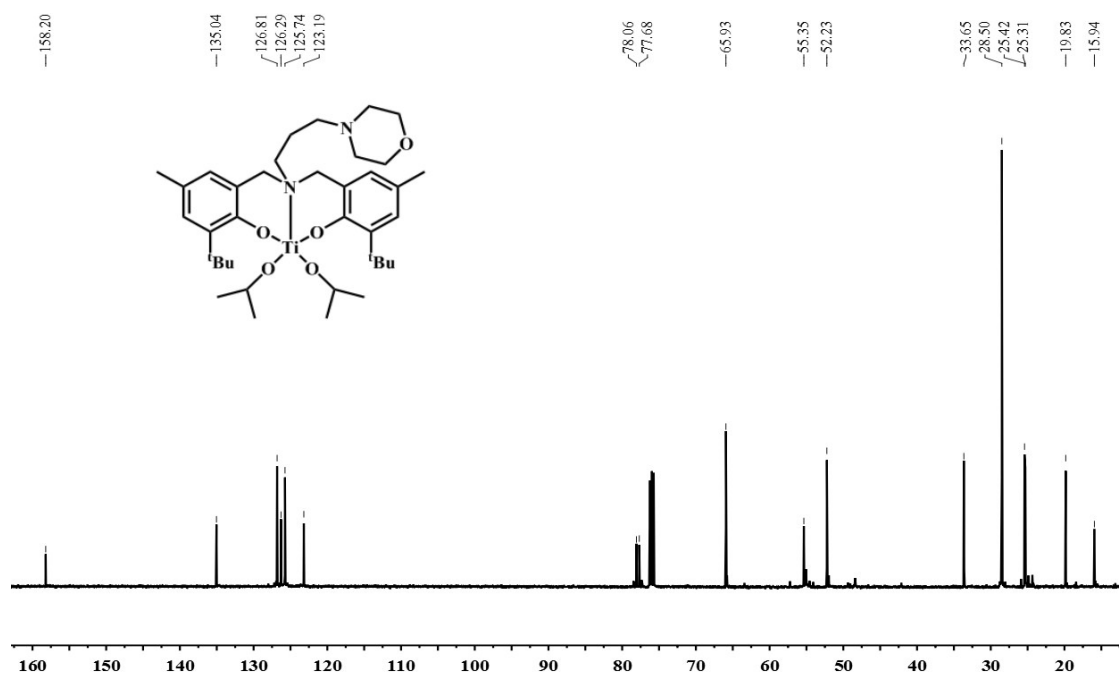

Figure S20 The  $^{13}\text{C}$  NMR spectrum of complex **3** ( $\text{CDCl}_3$ , 125MHz).
